# Supplementary material for: Evaluating Stacked Methylation Markers for Blood-Based Multicancer Detection
Source: Preprints.org preprint supplement (doi:10.20944/preprints202308.1802.v1), 2023-08-28
Supplement: Supplementary file 1 [file supplementary]

**Table S2. Measurements of accuracy from 10-fold cross validation logistic regression modelling using tumor vs blood samples**

| Biomarker | Dilution level (tumor DNA) | Cross-validation evaluation |               |       |            |
|-----------|----------------------------|-----------------------------|---------------|-------|------------|
|           |                            | Accuracy                    | SD (accuracy) | Kappa | SD (kappa) |
| G         | 0.01                       | 0.514                       | 0.023         | 0.028 | 0.045      |
| T         | 0.01                       | 0.543                       | 0.022         | 0.087 | 0.044      |
| Z         | 0.01                       | 0.532                       | 0.014         | 0.065 | 0.028      |
| GT        | 0.01                       | 0.532                       | 0.014         | 0.065 | 0.028      |
| GZ        | 0.01                       | 0.532                       | 0.014         | 0.065 | 0.028      |
| TZ        | 0.01                       | 0.532                       | 0.014         | 0.065 | 0.028      |
| GTZ       | 0.01                       | 0.532                       | 0.014         | 0.065 | 0.028      |
| G         | 0.1                        | 0.657                       | 0.014         | 0.314 | 0.027      |
| T         | 0.1                        | 0.792                       | 0.018         | 0.584 | 0.035      |
| Z         | 0.1                        | 0.778                       | 0.016         | 0.555 | 0.031      |
| GT        | 0.1                        | 0.778                       | 0.016         | 0.555 | 0.031      |
| GZ        | 0.1                        | 0.778                       | 0.016         | 0.555 | 0.031      |
| TZ        | 0.1                        | 0.778                       | 0.016         | 0.555 | 0.031      |
| GTZ       | 0.1                        | 0.778                       | 0.016         | 0.555 | 0.031      |
| G         | 0.25                       | 0.772                       | 0.010         | 0.543 | 0.021      |
| T         | 0.25                       | 0.853                       | 0.010         | 0.706 | 0.020      |
| Z         | 0.25                       | 0.855                       | 0.017         | 0.710 | 0.033      |
| GT        | 0.25                       | 0.855                       | 0.017         | 0.710 | 0.033      |
| GZ        | 0.25                       | 0.855                       | 0.017         | 0.710 | 0.033      |
| TZ        | 0.25                       | 0.855                       | 0.017         | 0.710 | 0.033      |
| GTZ       | 0.25                       | 0.855                       | 0.017         | 0.710 | 0.033      |
| G         | 0.5                        | 0.824                       | 0.012         | 0.648 | 0.024      |
| T         | 0.5                        | 0.884                       | 0.011         | 0.768 | 0.023      |
| Z         | 0.5                        | 0.897                       | 0.009         | 0.794 | 0.017      |
| GT        | 0.5                        | 0.897                       | 0.009         | 0.794 | 0.017      |
| GZ        | 0.5                        | 0.897                       | 0.009         | 0.794 | 0.017      |
| TZ        | 0.5                        | 0.897                       | 0.009         | 0.794 | 0.017      |
| GTZ       | 0.5                        | 0.897                       | 0.009         | 0.794 | 0.017      |
| G         | 0.75                       | 0.845                       | 0.019         | 0.689 | 0.038      |
| T         | 0.75                       | 0.895                       | 0.010         | 0.790 | 0.021      |
| Z         | 0.75                       | 0.907                       | 0.010         | 0.814 | 0.020      |
| GT        | 0.75                       | 0.907                       | 0.010         | 0.814 | 0.020      |
| GZ        | 0.75                       | 0.907                       | 0.010         | 0.814 | 0.020      |
| TZ        | 0.75                       | 0.907                       | 0.010         | 0.814 | 0.020      |
| GTZ       | 0.75                       | 0.907                       | 0.010         | 0.814 | 0.020      |
| G         | 0.9                        | 0.852                       | 0.014         | 0.704 | 0.027      |
| T         | 0.9                        | 0.900                       | 0.008         | 0.799 | 0.016      |
| Z         | 0.9                        | 0.911                       | 0.010         | 0.822 | 0.020      |
| GT        | 0.9                        | 0.911                       | 0.010         | 0.822 | 0.020      |
| GZ        | 0.9                        | 0.911                       | 0.010         | 0.822 | 0.020      |
| TZ        | 0.9                        | 0.911                       | 0.010         | 0.822 | 0.020      |
| GTZ       | 0.9                        | 0.911                       | 0.010         | 0.822 | 0.020      |
| G         | 0.99                       | 0.854                       | 0.009         | 0.709 | 0.018      |
| T         | 0.99                       | 0.900                       | 0.012         | 0.800 | 0.024      |
| Z         | 0.99                       | 0.912                       | 0.005         | 0.825 | 0.010      |
| GT        | 0.99                       | 0.912                       | 0.005         | 0.825 | 0.010      |
| GZ        | 0.99                       | 0.912                       | 0.005         | 0.825 | 0.010      |
| TZ        | 0.99                       | 0.912                       | 0.005         | 0.825 | 0.010      |
| GTZ       | 0.99                       | 0.912                       | 0.005         | 0.825 | 0.010      |
| G         | 0.999                      | 0.855                       | 0.013         | 0.710 | 0.025      |
| T         | 0.999                      | 0.900                       | 0.010         | 0.800 | 0.020      |
| Z         | 0.999                      | 0.912                       | 0.010         | 0.825 | 0.020      |
| GT        | 0.999                      | 0.912                       | 0.010         | 0.825 | 0.020      |
| GZ        | 0.999                      | 0.912                       | 0.010         | 0.825 | 0.020      |
| TZ        | 0.999                      | 0.912                       | 0.010         | 0.825 | 0.020      |
| GTZ       | 0.999                      | 0.912                       | 0.010         | 0.825 | 0.020      |
| G         | 1                          | 0.855                       | 0.009         | 0.710 | 0.018      |
| T         | 1                          | 0.900                       | 0.008         | 0.800 | 0.017      |
| Z         | 1                          | 0.913                       | 0.011         | 0.825 | 0.022      |
| GT        | 1                          | 0.913                       | 0.011         | 0.825 | 0.022      |
| GZ        | 1                          | 0.913                       | 0.011         | 0.825 | 0.022      |
| TZ        | 1                          | 0.913                       | 0.011         | 0.825 | 0.022      |
| GTZ       | 1                          | 0.913                       | 0.011         | 0.825 | 0.022      |
