# Supplementary material for: Evaluating Stacked Methylation Markers for Blood-Based Multicancer Detection
Source: Preprints.org preprint supplement (doi:10.20944/preprints202308.1802.v1), 2023-08-28
Supplement: Supplementary file 1 [file Table S4.xlsx]

## Sheet: Supp table
Table S4. Tumor type incidence rates extracted from SEER Research Plus Data (November 2021 Submission)
		Topography		Morphology
Type	Percentages of samples	Codea	Explanation	Codeb	Explanation	Subtype incidence rate	Combined TCGA tumor type incidence rate (cases per 100,000)		Explanations
BLCA	0.402985	C67.9	Bladder, NOS	8120/3	Transitional cell carcinoma, NOS	7.652	50.99		a	ICD-O-3 Site code
	0.144279	C67.4	Posterior wall of bladder	8120/3	Transitional cell carcinoma, NOS	1.476			b	ICD-O-3 Histology code
	0.134328	C67.2	Lateral wall of bladder	8120/3	Transitional cell carcinoma, NOS	2.743			Abbreviations:	BLCA	bladder urothelial carcinoma
	0.0995025	C67.9	Bladder, NOS	8130/3	Papillary transitional cell carcinoma	18.067				BRCA	breast invasive carcinoma
	0.0746269	C67.0	Trigone of bladder	8120/3	Transitional cell carcinoma, NOS	1.028				COAD	colon adenocarcinoma
	0.0497512	C67.1	Dome of bladder	8120/3	Transitional cell carcinoma, NOS	0.716				HNSC	head and neck squamous cell carcinoma
	0.0348259	C67.3	Anterior wall of bladder	8120/3	Transitional cell carcinoma, NOS	0.488				KIRC	kidney renal clear cell carcinoma
	0.0199005	C67.4	Posterior wall of bladder	8130/3	Papillary transitional cell carcinoma	4.316				KIRP	kidney renal papillary cell carcinoma
	0.0149254	C67.2	Lateral wall of bladder	8130/3	Papillary transitional cell carcinoma	9.887				LIHC	liver hepatocellular carcinoma
	0.00497512	C67.1	Dome of bladder	8260/3	Papillary adenocarcinoma, NOS	0.001				LUAD	lung adenocarcinoma
	0.00497512	C67.3	Anterior wall of bladder	8130/3	Papillary transitional cell carcinoma	0.896				LUSC	lung squamous cell carcinoma
	0.00497512	C67.0	Trigone of bladder	8130/3	Papillary transitional cell carcinoma	2.931				PAAD	pancreatic adenocarcinoma
	0.00497512	C67.5	Bladder neck	8120/3	Transitional cell carcinoma, NOS	0.547				PRAD	prostate adenocarcinoma
	0.00497512	C67.9	Bladder, NOS	8070/3	Squamous cell carcinoma, NOS	0.242				READ	rectum adenocarcinoma
BRCA	0.667162	C50.9	Breast, NOS	8500/3	Infiltrating duct carcinoma, NOS	15.482	67.864			STAD	stomach adenocarcinoma
	0.210996	C50.9	Breast, NOS	8520/3	Lobular carcinoma, NOS	2.8				UCEC	uterine corpus endometrioid carcinoma
	0.0356612	C50.9	Breast, NOS	8522/3	Infiltrating duct and lobular carcinoma	1.459				NOS	not otherwise specified
	0.0178306	C50.9	Breast, NOS	8480/3	Mucinous adenocarcinoma	0.399				TCGA	The Cancer Genome Atlas
	0.013373	C50.9	Breast, NOS	8575/3	Metaplastic carcinoma, NOS	0.096
	0.013373	C50.9	Breast, NOS	8523/3	Infiltrating duct mixed with other types of carcinoma	0.602
	0.00742942	C50.9	Breast, NOS	8510/3	Medullary carcinoma, NOS	0.017
	0.00594354	C50.9	Breast, NOS	8507/3	Ductal carcinoma, micropapillary	0.089
	0.00594354	C50.9	Breast, NOS	8503/3	Intraductal papillary adenocarcinoma with invasion	0.102
	0.00445765	C50.9	Breast, NOS	8524/3	Infiltrating lobular mixed with other types of carcinoma	0.072
	0.00297177	C50.9	Breast, NOS	8541/3	Paget disease and infiltrating ductal carcinoma of breast	0.061
	0.00297177	C50.9	Breast, NOS	8050/3	Papillary carcinoma, NOS	0.067
	0.00297177	C50.9	Breast, NOS	8022/3	Pleomorphic carcinoma	0.01
	0.00148588	C50.9	Breast, NOS	8502/3	Secretory carcinoma of breast	0.002
	0.00148588	C50.4	Upper-outer quadrant of breast	8500/3	Infiltrating duct carcinoma, NOS	45.134
	0.00148588	C50.9	Breast, NOS	8200/3	Adenoid cystic carcinoma	0.015
	0.00148588	C50.9	Breast, NOS	8090/3	Basal cell carcinoma, NOS	0
	0.00148588	C50.9	Breast, NOS	8013/3	Large cell neuroendocrine carcinoma	0.002
	0.00148588	C50.9	Breast, NOS	8010/3	Carcinoma, NOS	1.455
COAD	0.223443	C18.7	Sigmoid colon	8140/3	Adenocarcinoma, NOS	15.022	67.79
	0.18315	C18.2	Ascending colon	8140/3	Adenocarcinoma, NOS	12.267
	0.18315	C18.0	Cecum	8140/3	Adenocarcinoma, NOS	12.549
	0.150183	C18.9	Colon, NOS	8140/3	Adenocarcinoma, NOS	2.218
	0.043956	C18.2	Ascending colon	8480/3	Mucinous adenocarcinoma	1.468
	0.03663	C18.6	Descending colon	8140/3	Adenocarcinoma, NOS	3.6
	0.029304	C18.0	Cecum	8480/3	Mucinous adenocarcinoma	1.606
	0.025641	C18.3	Hepatic flexure of colon	8140/3	Adenocarcinoma, NOS	2.86
	0.021978	C18.4	Transverse colon	8140/3	Adenocarcinoma, NOS	5.969
	0.018315	C19.9	Rectosigmoid junction	8140/3	Adenocarcinoma, NOS	6.082
	0.014652	C18.9	Colon, NOS	8480/3	Mucinous adenocarcinoma	0.165
	0.014652	C18.4	Transverse colon	8480/3	Mucinous adenocarcinoma	0.608
	0.014652	C18.5	Splenic flexure of colon	8140/3	Adenocarcinoma, NOS	1.811
	0.010989	C18.7	Sigmoid colon	8480/3	Mucinous adenocarcinoma	0.802
	0.010989	C18.3	Hepatic flexure of colon	8480/3	Mucinous adenocarcinoma	0.296
	0.00732601	C18.6	Descending colon	8480/3	Mucinous adenocarcinoma	0.294
	0.003663	C18.5	Splenic flexure of colon	8480/3	Mucinous adenocarcinoma	0.166
	0.003663	C18.7	Sigmoid colon	8260/3	Papillary adenocarcinoma, NOS	0.004
	0.003663	C18.2	Ascending colon	8260/3	Papillary adenocarcinoma, NOS	0.003
HNSC	0.230047	C02.9	Tongue, NOS	8070/3	Squamous cell carcinoma, NOS	1.139	16.636
	0.215962	C32.9	Larynx, NOS	8070/3	Squamous cell carcinoma, NOS	0.61
	0.164319	C14.8	Overlapping lesion of lip, oral cavity & pharynx	8070/3	Squamous cell carcinoma, NOS	0.254
	0.0657277	C04.9	Floor of mouth, NOS	8070/3	Squamous cell carcinoma, NOS	0.641
	0.0610329	C09.9	Tonsil, NOS	8070/3	Squamous cell carcinoma, NOS	3.101
	0.0399061	C02.9	Tongue, NOS	8071/3	Squamous cell carcinoma, keratinizing, NOS	0.376
	0.0399061	C01.9	Base of tongue, NOS	8070/3	Squamous cell carcinoma, NOS	3.734
	0.028169	C06.9	Mouth, NOS	8070/3	Squamous cell carcinoma, NOS	0.234
	0.028169	C06.0	Cheek mucosa	8070/3	Squamous cell carcinoma, NOS	0.53
	0.0140845	C10.9	Oropharynx, NOS	8070/3	Squamous cell carcinoma, NOS	0.732
	0.0117371	C32.9	Larynx, NOS	8071/3	Squamous cell carcinoma, keratinizing, NOS	0.133
	0.00938967	C04.9	Floor of mouth, NOS	8071/3	Squamous cell carcinoma, keratinizing, NOS	0.201
	0.00938967	C13.9	Hypopharynx, NOS	8070/3	Squamous cell carcinoma, NOS	0.424
	0.00938967	C03.9	Gum, NOS	8070/3	Squamous cell carcinoma, NOS	0.096
	0.00704225	C09.9	Tonsil, NOS	8072/3	Squamous cell carcinoma, large cell, nonkeratinizing, NOS	0.844
	0.00704225	C05.0	Hard palate	8070/3	Squamous cell carcinoma, NOS	0.209
	0.00469484	C01.9	Base of tongue, NOS	8083/3	Basaloid squamous cell carcinoma	0.261
	0.00469484	C06.9	Mouth, NOS	8071/3	Squamous cell carcinoma, keratinizing, NOS	0.067
	0.00469484	C00.9	Lip, NOS	8070/3	Squamous cell carcinoma, NOS	0.089
	0.00234742	C32.9	Larynx, NOS	8083/3	Basaloid squamous cell carcinoma	0.008
	0.00234742	C10.9	Oropharynx, NOS	8083/3	Basaloid squamous cell carcinoma	0.022
	0.00234742	C09.9	Tonsil, NOS	8083/3	Basaloid squamous cell carcinoma	0.228
	0.00234742	C06.0	Cheek mucosa	8083/3	Basaloid squamous cell carcinoma	0.002
	0.00234742	C01.9	Base of tongue, NOS	8074/3	Squamous cell carcinoma, spindle cell	0.012
	0.00234742	C32.9	Larynx, NOS	8072/3	Squamous cell carcinoma, large cell, nonkeratinizing, NOS	0.016
	0.00234742	C10.3	Posterior wall of oropharynx	8071/3	Squamous cell carcinoma, keratinizing, NOS	0.024
	0.00234742	C06.2	Retromolar area	8071/3	Squamous cell carcinoma, keratinizing, NOS	0.14
	0.00234742	C06.0	Cheek mucosa	8071/3	Squamous cell carcinoma, keratinizing, NOS	0.189
	0.00234742	C05.9	Palate, NOS	8071/3	Squamous cell carcinoma, keratinizing, NOS	0.01
	0.00234742	C04.0	Anterior floor of mouth	8071/3	Squamous cell carcinoma, keratinizing, NOS	0.092
	0.00234742	C03.9	Gum, NOS	8071/3	Squamous cell carcinoma, keratinizing, NOS	0.034
	0.00234742	C01.9	Base of tongue, NOS	8071/3	Squamous cell carcinoma, keratinizing, NOS	0.529
	0.00234742	C00.9	Lip, NOS	8071/3	Squamous cell carcinoma, keratinizing, NOS	0.01
	0.00234742	C41.1	Mandible	8070/3	Squamous cell carcinoma, NOS	0.033
	0.00234742	C04.0	Anterior floor of mouth	8070/3	Squamous cell carcinoma, NOS	0.292
	0.00234742	C03.0	Upper gum	8070/3	Squamous cell carcinoma, NOS	0.255
	0.00234742	C02.2	Ventral surface of tongue, NOS	8070/3	Squamous cell carcinoma, NOS	0.449
	0.00234742	C02.1	Border of tongue	8070/3	Squamous cell carcinoma, NOS	0.616
KIRC	0.983051	C64.9	Kidney, NOS	8310/3	Clear cell adenocarcinoma, NOS	23.285	35.091
	0.0169492	C64.9	Kidney, NOS	8312/3	Renal cell carcinoma	11.806
READ	0.382979	C19.9	Rectosigmoid junction	8140/3	Adenocarcinoma, NOS	6.082	27.614
	0.361702	C20.9	Rectum, NOS	8140/3	Adenocarcinoma, NOS	16.441
	0.0851064	C20.9	Rectum, NOS	8263/3	Adenocarcinoma in tubulovillous adenoma	1.861
	0.0531915	C20.9	Rectum, NOS	8211/3	Tubular adenocarcinoma	0.018
	0.0319149	C20.9	Rectum, NOS	8480/3	Mucinous adenocarcinoma	0.64
	0.0319149	C19.9	Rectosigmoid junction	8480/3	Mucinous adenocarcinoma	0.298
	0.0212766	C20.9	Rectum, NOS	8255/3	Adenocarcinoma with mixed subtypes	0.054
	0.0212766	C49.4	Conn, subcutaneous, other soft tis: abdomen	8140/3	Adenocarcinoma, NOS	0.002
	0.0106383	C18.9	Colon, NOS	8140/3	Adenocarcinoma, NOS	2.218
KIRP	1	C64.9	Kidney, NOS	8260/3	Papillary adenocarcinoma, NOS	5.474	5.474
LIHC	0.97351	C22.0	Liver	8170/3	Hepatocellular carcinoma, NOS	23.036	23.208
	0.013245	C22.0	Liver	8171/3	Hepatocellular carcinoma, fibrolamellar	0.022
	0.00662252	C22.0	Liver	8174/3	Hepatocellular carcinoma, clear cell type	0.132
	0.00662252	C22.0	Liver	8173/3	Hepatocellular carcinoma, spindle cell variant	0.018
LUAD	0.351724	C34.1	Upper lobe, lung	8140/3	Adenocarcinoma, NOS	34.87	77.395
	0.188506	C34.3	Lower lobe, lung	8140/3	Adenocarcinoma, NOS	17.706
	0.112644	C34.1	Upper lobe, lung	8255/3	Adenocarcinoma with mixed subtypes	1.949
	0.0689655	C34.3	Lower lobe, lung	8255/3	Adenocarcinoma with mixed subtypes	1.134
	0.0344828	C34.1	Upper lobe, lung	8550/3	Acinar cell carcinoma	1.411
	0.0298851	C34.1	Upper lobe, lung	8260/3	Papillary adenocarcinoma, NOS	0.548
	0.0275862	C34.2	Middle lobe, lung	8140/3	Adenocarcinoma, NOS	2.916
	0.0252874	C34.3	Lower lobe, lung	8252/3	Bronchiolo-alveolar carcinoma, non-mucinous	0.06
	0.0206897	C34.3	Lower lobe, lung	8480/3	Mucinous adenocarcinoma	0.977
	0.016092	C34.3	Lower lobe, lung	8550/3	Acinar cell carcinoma	0.684
	0.016092	C34.1	Upper lobe, lung	8252/3	Bronchiolo-alveolar carcinoma, non-mucinous	0.103
	0.016092	C34.9	Lung, NOS	8140/3	Adenocarcinoma, NOS	9.191
	0.0114943	C34.2	Middle lobe, lung	8255/3	Adenocarcinoma with mixed subtypes	0.176
	0.0114943	C34.1	Upper lobe, lung	8230/3	Solid carcinoma, NOS	0.325
	0.0091954	C34.1	Upper lobe, lung	8480/3	Mucinous adenocarcinoma	0.736
	0.0091954	C34.3	Lower lobe, lung	8260/3	Papillary adenocarcinoma, NOS	0.458
	0.0091954	C34.9	Lung, NOS	8255/3	Adenocarcinoma with mixed subtypes	0.095
	0.00689655	C34.3	Lower lobe, lung	8253/3	Bronchiolo-alveolar carcinoma, mucinous	0.269
	0.0045977	C34.1	Upper lobe, lung	8250/3	Bronchiolo-alveolar adenocarcinoma, NOS	1.071
	0.00229885	C34.2	Middle lobe, lung	8550/3	Acinar cell carcinoma	0.107
	0.00229885	C34.3	Lower lobe, lung	8507/3	Ductal carcinoma, micropapillary	0.004
	0.00229885	C34.1	Upper lobe, lung	8507/3	Ductal carcinoma, micropapillary	0.005
	0.00229885	C34.1	Upper lobe, lung	8490/3	Signet ring cell carcinoma	0.089
	0.00229885	C34.1	Upper lobe, lung	8310/3	Clear cell adenocarcinoma, NOS	0.064
	0.00229885	C34.9	Lung, NOS	8260/3	Papillary adenocarcinoma, NOS	0.082
	0.00229885	C34.8	Overlapping lesion of lung	8260/3	Papillary adenocarcinoma, NOS	0.011
	0.00229885	C34.2	Middle lobe, lung	8260/3	Papillary adenocarcinoma, NOS	0.081
	0.00229885	C34.8	Overlapping lesion of lung	8255/3	Adenocarcinoma with mixed subtypes	0.031
	0.00229885	C34.1	Upper lobe, lung	8253/3	Bronchiolo-alveolar carcinoma, mucinous	0.165
	0.00229885	C34.8	Overlapping lesion of lung	8252/3	Bronchiolo-alveolar carcinoma, non-mucinous	0.002
	0.00229885	C34.3	Lower lobe, lung	8250/3	Bronchiolo-alveolar adenocarcinoma, NOS	0.632
	0.00229885	C34.0	Main bronchus	8140/3	Adenocarcinoma, NOS	1.443
LUSC	0.490251	C34.1	Upper lobe, lung	8070/3	Squamous cell carcinoma, NOS	19.031	39.332
	0.306407	C34.3	Lower lobe, lung	8070/3	Squamous cell carcinoma, NOS	10.642
	0.0584958	C34.9	Lung, NOS	8070/3	Squamous cell carcinoma, NOS	2.769
	0.0278552	C34.2	Middle lobe, lung	8070/3	Squamous cell carcinoma, NOS	1.31
	0.0222841	C34.8	Overlapping lesion of lung	8070/3	Squamous cell carcinoma, NOS	0.403
	0.0194986	C34.3	Lower lobe, lung	8083/3	Basaloid squamous cell carcinoma	0.085
	0.0194986	C34.1	Upper lobe, lung	8071/3	Squamous cell carcinoma, keratinizing, NOS	1.293
	0.0111421	C34.1	Upper lobe, lung	8083/3	Basaloid squamous cell carcinoma	0.143
	0.0111421	C34.3	Lower lobe, lung	8071/3	Squamous cell carcinoma, keratinizing, NOS	0.731
	0.00835655	C34.1	Upper lobe, lung	8052/3	Papillary squamous cell carcinoma	0.016
	0.00557103	C34.3	Lower lobe, lung	8072/3	Squamous cell carcinoma, large cell, nonkeratinizing, NOS	0.377
	0.00278552	C34.1	Upper lobe, lung	8140/3	Adenocarcinoma, NOS	NA
	0.00278552	C34.2	Middle lobe, lung	8073/3	Squamous cell carcinoma, small cell, nonkeratinizing	0.002
	0.00278552	C34.1	Upper lobe, lung	8072/3	Squamous cell carcinoma, large cell, nonkeratinizing, NOS	0.634
	0.00278552	C34.9	Lung, NOS	8071/3	Squamous cell carcinoma, keratinizing, NOS	0.136
	0.00278552	C34.2	Middle lobe, lung	8071/3	Squamous cell carcinoma, keratinizing, NOS	0.078
	0.00278552	C34.0	Main bronchus	8070/3	Squamous cell carcinoma, NOS	1.671
	0.00278552	C34.3	Lower lobe, lung	8052/3	Papillary squamous cell carcinoma	0.011
PAAD	0.584615	C25.0	Head of pancreas	8500/3	Infiltrating duct carcinoma, NOS	2.713	24.184
	0.169231	C25.9	Pancreas, NOS	8500/3	Infiltrating duct carcinoma, NOS	0.146
	0.123077	C25.0	Head of pancreas	8140/3	Adenocarcinoma, NOS	12.887
	0.0307692	C25.2	Tail of pancreas	8500/3	Infiltrating duct carcinoma, NOS	0.494
	0.0307692	C25.1	Body of pancreas	8500/3	Infiltrating duct carcinoma, NOS	0.485
	0.0307692	C25.9	Pancreas, NOS	8140/3	Adenocarcinoma, NOS	3.539
	0.0153846	C25.0	Head of pancreas	8480/3	Mucinous adenocarcinoma	0.321
	0.0153846	C25.2	Tail of pancreas	8140/3	Adenocarcinoma, NOS	3.599
PRAD	0.754032	C61.9	Prostate gland	8550/3	Acinar cell carcinoma	0.303	178.461
	0.221774	C61.9	Prostate gland	8140/3	Adenocarcinoma, NOS	177.755
	0.0120968	C61.9	Prostate gland	8500/3	Infiltrating duct carcinoma, NOS	0.331
	0.0120968	C61.9	Prostate gland	8255/3	Adenocarcinoma with mixed subtypes	0.072
STAD	0.126923	C16.0	Cardia, NOS	8140/3	Adenocarcinoma, NOS	4.787	12.552
	0.119231	C16.3	Gastric antrum	8140/3	Adenocarcinoma, NOS	1.595
	0.1	C16.1	Fundus of stomach	8140/3	Adenocarcinoma, NOS	0.386
	0.0923077	C16.3	Gastric antrum	8145/3	Carcinoma, diffuse type	0.179
	0.0769231	C16.3	Gastric antrum	8211/3	Tubular adenocarcinoma	0.054
	0.0769231	C16.2	Body of stomach	8140/3	Adenocarcinoma, NOS	0.829
	0.0576923	C16.3	Gastric antrum	8144/3	Adenocarcinoma, intestinal type	0.561
	0.0538462	C16.2	Body of stomach	8144/3	Adenocarcinoma, intestinal type	0.227
	0.05	C16.2	Body of stomach	8211/3	Tubular adenocarcinoma	0.021
	0.0384615	C16.2	Body of stomach	8145/3	Carcinoma, diffuse type	0.108
	0.0346154	C16.3	Gastric antrum	8480/3	Mucinous adenocarcinoma	0.058
	0.0269231	C16.0	Cardia, NOS	8145/3	Carcinoma, diffuse type	0.071
	0.0230769	C16.0	Cardia, NOS	8144/3	Adenocarcinoma, intestinal type	0.277
	0.0192308	C16.1	Fundus of stomach	8144/3	Adenocarcinoma, intestinal type	0.094
	0.0153846	C16.1	Fundus of stomach	8145/3	Carcinoma, diffuse type	0.026
	0.0115385	C16.2	Body of stomach	8480/3	Mucinous adenocarcinoma	0.018
	0.0115385	C16.1	Fundus of stomach	8211/3	Tubular adenocarcinoma	0.008
	0.0115385	C16.0	Cardia, NOS	8211/3	Tubular adenocarcinoma	0.018
	0.00769231	C16.0	Cardia, NOS	8490/3	Signet ring cell carcinoma	0.576
	0.00769231	C16.0	Cardia, NOS	8480/3	Mucinous adenocarcinoma	0.086
	0.00769231	C16.2	Body of stomach	8260/3	Papillary adenocarcinoma, NOS	0.005
	0.00769231	C16.0	Cardia, NOS	8260/3	Papillary adenocarcinoma, NOS	0.009
	0.00384615	C16.3	Gastric antrum	8490/3	Signet ring cell carcinoma	0.625
	0.00384615	C16.2	Body of stomach	8490/3	Signet ring cell carcinoma	0.39
	0.00384615	C16.9	Stomach, NOS	8480/3	Mucinous adenocarcinoma	0.038
	0.00384615	C16.3	Gastric antrum	8260/3	Papillary adenocarcinoma, NOS	0.007
	0.00384615	C16.1	Fundus of stomach	8260/3	Papillary adenocarcinoma, NOS	0.003
	0.00384615	C16.9	Stomach, NOS	8140/3	Adenocarcinoma, NOS	1.496
UCEC	0.714286	C54.1	Endometrium	8380/3	Endometrioid carcinoma	27.204	32.947
	0.258621	C54.1	Endometrium	8441/3	Serous cystadenocarcinoma, NOS	2.652
	0.00738916	C54.1	Endometrium	8460/3	Papillary serous cystadenocarcinoma	0.867
	0.00492611	C54.1	Endometrium	8382/3	Endometrioid adenocarcinoma, secretory variant	0.051
	0.00492611	C54.9	Corpus uteri	8380/3	Endometrioid carcinoma	0.277
	0.00246305	C54.0	Isthmus uteri	8380/3	Endometrioid carcinoma	0.023
	0.00246305	C54.1	Endometrium	8255/3	Adenocarcinoma with mixed subtypes	0.162
	0.00246305	C54.1	Endometrium	8140/3	Adenocarcinoma, NOS	1.62
	0.00246305	C54.1	Endometrium	8020/3	Carcinoma, undifferentiated, NOS	0.091
