# Supplementary material for: Evaluating Stacked Methylation Markers for Blood-Based Multicancer Detection
Source: Preprints.org preprint supplement (doi:10.20944/preprints202308.1802.v1), 2023-08-28
Supplement: Supplementary file 7 [file supplementary]

**Table S8. Performance of the three-marker combination (*GALR1*, *TLX1*, and *ZNF154*) in classifying TCGA tumors using cross validation (validation cohorts)**

| Type <sup>a</sup> | Tumor samples | Normal samples | Sensitivity             |           | Specificity             |           |
|-------------------|---------------|----------------|-------------------------|-----------|-------------------------|-----------|
|                   |               |                | <i>Mean<sup>b</sup></i> | <i>SD</i> | <i>Mean<sup>b</sup></i> | <i>SD</i> |
| BLCA              | 100           | 10             | 92.4%                   | 2.1       | 80.0%                   | 12.2      |
| BRCA              | 338           | 48             | 92.7%                   | 2.3       | 89.2%                   | 6.0       |
| COAD              | 137           | 19             | 95.6%                   | 1.3       | 98.9%                   | 2.4       |
| HNSC              | 213           | 25             | 99.0%                   | 0.6       | 94.4%                   | 2.2       |
| KIRC              | 148           | 80             | 84.9%                   | 2.7       | 91.3%                   | 3.2       |
| KIRP              | 78            | 22             | 72.3%                   | 14.7      | 71.8%                   | 23.7      |
| LIHC              | 75            | 25             | 92.3%                   | 2.6       | 95.2%                   | 5.2       |
| LUAD              | 218           | 16             | 98.5%                   | 1.5       | 88.8%                   | 10.3      |
| LUSC              | 179           | 21             | 98.9%                   | 0.9       | 94.3%                   | 2.1       |
| PAAD*             | 32            | 4              | 95.6%                   | 5.2       | 90.0%                   | 13.7      |
| PRAD              | 124           | 24             | 90.9%                   | 1.7       | 83.3%                   | 5.1       |
| READ*             | 48            | 3              | 97.5%                   | 2.3       | 100.0%                  | 0.0       |
| STAD*             | 130           | 1              | 98.6%                   | 1.0       | 20.0%                   | 44.7      |
| UCEC              | 202           | 23             | 98.6%                   | 0.5       | 94.8%                   | 7.1       |

<sup>a</sup> Tumor types are abbreviated as in Figure 1

<sup>b</sup> TCGA datasets were randomly split in two five times and used as training/validation cohorts. The mean and SD report the average performance across the five iterations.

\* Due to <10 samples in either the tumor or normal cohort, the performance results should be interpreted with caution

Abbreviations: SD = Standard Deviation
