# Supplementary material for: Evaluating Stacked Methylation Markers for Blood-Based Multicancer Detection
Source: Preprints.org preprint supplement (doi:10.20944/preprints202308.1802.v1), 2023-08-28
Supplement: Supplementary file 8 [file supplementary]

**Table S6. Performance of GALR1, TLX1, and ZNF154 in classifying TCGA tumors**

| Type <sup>a</sup> | Combination           | Threshold <sup>b</sup> | TP  | FP | TN  | FN  | Sensitivity | Specificity | AUC   |
|-------------------|-----------------------|------------------------|-----|----|-----|-----|-------------|-------------|-------|
| BLCA              | GALR1                 | 0.97                   | 163 | 1  | 19  | 38  | 81.1%       | 95.0%       | 0.934 |
|                   | TLX1                  | 0.92                   | 143 | 1  | 19  | 58  | 71.1%       | 95.0%       | 0.865 |
|                   | ZNF154                | 0.96                   | 174 | 0  | 20  | 27  | 86.6%       | 100.0%      | 0.961 |
|                   | GALR1 + TLX1          | 0.76                   | 187 | 3  | 17  | 14  | 93.0%       | 85.0%       | 0.944 |
|                   | GALR1 + ZNF154        | 0.95                   | 178 | 1  | 19  | 23  | 88.6%       | 95.0%       | 0.967 |
|                   | TLX1 + ZNF154         | 0.91                   | 184 | 1  | 19  | 17  | 91.5%       | 95.0%       | 0.968 |
|                   | GALR1 + TLX1 + ZNF154 | 0.93                   | 182 | 1  | 19  | 19  | 90.5%       | 95.0%       | 0.967 |
| BRCA              | GALR1                 | 0.88                   | 570 | 5  | 91  | 106 | 84.3%       | 94.8%       | 0.935 |
|                   | TLX1                  | 0.78                   | 565 | 8  | 88  | 111 | 83.6%       | 91.7%       | 0.906 |
|                   | ZNF154                | 0.91                   | 496 | 3  | 93  | 180 | 73.4%       | 96.9%       | 0.865 |
|                   | GALR1 + TLX1          | 0.83                   | 612 | 6  | 90  | 64  | 90.5%       | 93.8%       | 0.962 |
|                   | GALR1 + ZNF154        | 0.93                   | 605 | 4  | 92  | 71  | 89.5%       | 95.8%       | 0.967 |
|                   | TLX1 + ZNF154         | 0.92                   | 582 | 3  | 93  | 94  | 86.1%       | 96.9%       | 0.964 |
|                   | GALR1 + TLX1 + ZNF154 | 0.90                   | 612 | 4  | 92  | 64  | 90.5%       | 95.8%       | 0.979 |
| COAD              | GALR1                 | 0.85                   | 259 | 0  | 38  | 15  | 94.5%       | 100.0%      | 0.965 |
|                   | TLX1                  | 0.81                   | 260 | 0  | 38  | 14  | 94.9%       | 100.0%      | 0.973 |
|                   | ZNF154                | 0.91                   | 176 | 3  | 35  | 98  | 64.2%       | 92.1%       | 0.812 |
|                   | GALR1 + TLX1          | 0.85                   | 264 | 0  | 38  | 10  | 96.4%       | 100.0%      | 0.992 |
|                   | GALR1 + ZNF154        | 0.91                   | 257 | 0  | 38  | 17  | 93.8%       | 100.0%      | 0.979 |
|                   | TLX1 + ZNF154         | 0.88                   | 257 | 0  | 38  | 17  | 93.8%       | 100.0%      | 0.978 |
|                   | GALR1 + TLX1 + ZNF154 | 0.84                   | 265 | 0  | 38  | 9   | 96.7%       | 100.0%      | 0.992 |
| HNSC              | GALR1                 | 0.94                   | 370 | 1  | 49  | 56  | 86.9%       | 98.0%       | 0.945 |
|                   | TLX1                  | 0.88                   | 378 | 1  | 49  | 48  | 88.7%       | 98.0%       | 0.934 |
|                   | ZNF154                | 0.66                   | 418 | 2  | 48  | 8   | 98.1%       | 96.0%       | 0.991 |
|                   | GALR1 + TLX1          | 0.79                   | 420 | 1  | 49  | 6   | 98.6%       | 98.0%       | 0.988 |
|                   | GALR1 + ZNF154        | 0.91                   | 415 | 1  | 49  | 11  | 97.4%       | 98.0%       | 0.996 |
|                   | TLX1 + ZNF154         | 0.54                   | 423 | 2  | 48  | 3   | 99.3%       | 96.0%       | 0.994 |
|                   | GALR1 + TLX1 + ZNF154 | 0.80                   | 420 | 1  | 49  | 6   | 98.6%       | 98.0%       | 0.996 |
| KIRC              | GALR1                 | 0.40                   | 261 | 29 | 131 | 35  | 88.2%       | 81.9%       | 0.914 |
|                   | TLX1                  | 0.72                   | 147 | 5  | 155 | 149 | 49.7%       | 96.9%       | 0.753 |
|                   | ZNF154                | 0.64                   | 223 | 6  | 154 | 73  | 75.3%       | 96.3%       | 0.898 |
|                   | GALR1 + TLX1          | 0.45                   | 240 | 21 | 139 | 56  | 81.1%       | 86.9%       | 0.901 |
|                   | GALR1 + ZNF154        | 0.51                   | 250 | 13 | 147 | 46  | 84.5%       | 91.9%       | 0.927 |
|                   | TLX1 + ZNF154         | 0.66                   | 228 | 3  | 157 | 68  | 77.0%       | 98.1%       | 0.909 |
|                   | GALR1 + TLX1 + ZNF154 | 0.65                   | 244 | 7  | 153 | 52  | 82.4%       | 95.6%       | 0.931 |

|      |                       |      |     |    |    |     |       |        |       |
|------|-----------------------|------|-----|----|----|-----|-------|--------|-------|
| KIRP | GALR1                 | 0.72 | 100 | 10 | 35 | 56  | 64.1% | 77.8%  | 0.738 |
|      | TLX1                  | 0.72 | 94  | 8  | 37 | 62  | 60.3% | 82.2%  | 0.738 |
|      | ZNF154                | 0.77 | 104 | 5  | 40 | 52  | 66.7% | 88.9%  | 0.853 |
|      | GALR1 + TLX1          | 0.69 | 111 | 11 | 34 | 45  | 71.2% | 75.6%  | 0.765 |
|      | GALR1 + ZNF154        | 0.75 | 106 | 6  | 39 | 50  | 67.9% | 86.7%  | 0.855 |
|      | TLX1 + ZNF154         | 0.69 | 115 | 7  | 38 | 41  | 73.7% | 84.4%  | 0.860 |
|      | GALR1 + TLX1 + ZNF154 | 0.70 | 115 | 7  | 38 | 41  | 73.7% | 84.4%  | 0.859 |
| LHC  | GALR1                 | 0.74 | 70  | 3  | 47 | 81  | 46.4% | 94.0%  | 0.635 |
|      | TLX1                  | 0.74 | 103 | 1  | 49 | 48  | 68.2% | 98.0%  | 0.767 |
|      | ZNF154                | 0.58 | 131 | 1  | 49 | 20  | 86.8% | 98.0%  | 0.916 |
|      | GALR1 + TLX1          | 0.72 | 110 | 2  | 48 | 41  | 72.8% | 96.0%  | 0.840 |
|      | GALR1 + ZNF154        | 0.54 | 132 | 1  | 49 | 19  | 87.4% | 98.0%  | 0.920 |
|      | TLX1 + ZNF154         | 0.41 | 139 | 1  | 49 | 12  | 92.1% | 98.0%  | 0.945 |
|      | GALR1 + TLX1 + ZNF154 | 0.43 | 139 | 1  | 49 | 12  | 92.1% | 98.0%  | 0.950 |
| LUAD | GALR1                 | 0.81 | 414 | 2  | 30 | 23  | 94.7% | 93.8%  | 0.977 |
|      | TLX1                  | 0.84 | 404 | 1  | 31 | 33  | 92.4% | 96.9%  | 0.971 |
|      | ZNF154                | 0.96 | 327 | 0  | 32 | 110 | 74.8% | 100.0% | 0.912 |
|      | GALR1 + TLX1          | 0.66 | 429 | 1  | 31 | 8   | 98.2% | 96.9%  | 0.994 |
|      | GALR1 + ZNF154        | 0.97 | 412 | 0  | 32 | 25  | 94.3% | 100.0% | 0.992 |
|      | TLX1 + ZNF154         | 0.94 | 419 | 0  | 32 | 18  | 95.9% | 100.0% | 0.993 |
|      | GALR1 + TLX1 + ZNF154 | 0.98 | 425 | 0  | 32 | 12  | 97.3% | 100.0% | 0.999 |
| LUSC | GALR1                 | 0.94 | 292 | 0  | 42 | 67  | 81.3% | 100.0% | 0.938 |
|      | TLX1                  | 0.81 | 330 | 1  | 41 | 29  | 91.9% | 97.6%  | 0.972 |
|      | ZNF154                | 0.87 | 335 | 0  | 42 | 24  | 93.3% | 100.0% | 0.979 |
|      | GALR1 + TLX1          | 0.71 | 348 | 1  | 41 | 11  | 96.9% | 97.6%  | 0.990 |
|      | GALR1 + ZNF154        | 0.55 | 354 | 0  | 42 | 5   | 98.6% | 100.0% | 0.993 |
|      | TLX1 + ZNF154         | 0.96 | 348 | 0  | 42 | 11  | 96.9% | 100.0% | 0.995 |
|      | GALR1 + TLX1 + ZNF154 | 0.64 | 356 | 0  | 42 | 3   | 99.2% | 100.0% | 0.996 |
| PAAD | GALR1                 | 0.94 | 56  | 0  | 9  | 9   | 86.2% | 100.0% | 0.967 |
|      | TLX1                  | 0.84 | 55  | 0  | 9  | 10  | 84.6% | 100.0% | 0.930 |
|      | ZNF154                | 0.61 | 63  | 0  | 9  | 2   | 96.9% | 100.0% | 0.981 |
|      | GALR1 + TLX1          | 0.79 | 63  | 0  | 9  | 2   | 96.9% | 100.0% | 0.986 |
|      | GALR1 + ZNF154        | 0.58 | 64  | 0  | 9  | 1   | 98.5% | 100.0% | 0.990 |
|      | TLX1 + ZNF154         | 0.68 | 63  | 0  | 9  | 2   | 96.9% | 100.0% | 0.990 |
|      | GALR1 + TLX1 + ZNF154 | 0.58 | 64  | 0  | 9  | 1   | 98.5% | 100.0% | 0.991 |
| PRAD | GALR1                 | 0.81 | 166 | 2  | 47 | 82  | 66.9% | 95.9%  | 0.847 |
|      | TLX1                  | 0.81 | 221 | 5  | 44 | 27  | 89.1% | 89.8%  | 0.935 |
|      | ZNF154                | 0.82 | 222 | 6  | 43 | 26  | 89.5% | 87.8%  | 0.918 |
|      | GALR1 + TLX1          | 0.74 | 228 | 5  | 44 | 20  | 91.9% | 89.8%  | 0.943 |

|      |                       |      |     |   |    |     |        |        |       |
|------|-----------------------|------|-----|---|----|-----|--------|--------|-------|
|      | GALR1 + ZNF154        | 0.72 | 229 | 6 | 43 | 19  | 92.3%  | 87.8%  | 0.935 |
|      | TLX1 + ZNF154         | 0.79 | 223 | 5 | 44 | 25  | 89.9%  | 89.8%  | 0.935 |
|      | GALR1 + TLX1 + ZNF154 | 0.82 | 224 | 4 | 45 | 24  | 90.3%  | 91.8%  | 0.941 |
| READ | GALR1                 | 0.86 | 82  | 0 | 7  | 14  | 85.4%  | 100.0% | 0.894 |
|      | TLX1                  | 0.68 | 93  | 0 | 7  | 3   | 96.9%  | 100.0% | 0.984 |
|      | ZNF154                | 0.95 | 75  | 0 | 7  | 21  | 78.1%  | 100.0% | 0.921 |
|      | GALR1 + TLX1          | 0.61 | 95  | 0 | 7  | 1   | 99.0%  | 100.0% | 0.990 |
|      | GALR1 + ZNF154        | 0.93 | 90  | 0 | 7  | 6   | 93.8%  | 100.0% | 0.988 |
|      | TLX1 + ZNF154         | 0.50 | 96  | 0 | 7  | 0   | 100.0% | 100.0% | 1.000 |
|      | GALR1 + TLX1 + ZNF154 | 0.50 | 96  | 0 | 7  | 0   | 100.0% | 100.0% | 1.000 |
| STAD | GALR1                 | 0.99 | 178 | 0 | 2  | 82  | 68.5%  | 100.0% | 0.821 |
|      | TLX1                  | 0.99 | 209 | 0 | 2  | 51  | 80.4%  | 100.0% | 0.879 |
|      | ZNF154                | 0.94 | 255 | 0 | 2  | 5   | 98.1%  | 100.0% | 0.987 |
|      | GALR1 + TLX1          | 0.99 | 204 | 0 | 2  | 56  | 78.5%  | 100.0% | 0.869 |
|      | GALR1 + ZNF154        | 0.92 | 255 | 0 | 2  | 5   | 98.1%  | 100.0% | 0.985 |
|      | TLX1 + ZNF154         | 0.78 | 259 | 0 | 2  | 1   | 99.6%  | 100.0% | 0.998 |
|      | GALR1 + TLX1 + ZNF154 | 0.50 | 260 | 0 | 2  | 0   | 100.0% | 100.0% | 1.000 |
| UCEC | GALR1                 | 0.95 | 252 | 0 | 46 | 153 | 62.2%  | 100.0% | 0.817 |
|      | TLX1                  | 0.84 | 336 | 0 | 46 | 69  | 83.0%  | 100.0% | 0.903 |
|      | ZNF154                | 0.82 | 402 | 0 | 46 | 3   | 99.3%  | 100.0% | 0.997 |
|      | GALR1 + TLX1          | 0.84 | 348 | 1 | 45 | 57  | 85.9%  | 97.8%  | 0.926 |
|      | GALR1 + ZNF154        | 0.80 | 401 | 0 | 46 | 4   | 99.0%  | 100.0% | 0.997 |
|      | TLX1 + ZNF154         | 0.77 | 401 | 0 | 46 | 4   | 99.0%  | 100.0% | 0.997 |
|      | GALR1 + TLX1 + ZNF154 | 0.79 | 401 | 0 | 46 | 4   | 99.0%  | 100.0% | 0.997 |

<sup>a</sup> Tumor types are abbreviated as in Figure 1

<sup>b</sup> Probability threshold obtained by applying Youden's Index after logistic regression and ROC curve analysis

Abbreviations: TP = True Positive, FP = False Positive, TN = True Negative, FN = False Negative, AUC = Area Under the ROC Curve, ROC = Receiver Operating Characteristics
