# Supplementary material for: Evaluating Stacked Methylation Markers for Blood-Based Multicancer Detection
Source: Preprints.org preprint supplement (doi:10.20944/preprints202308.1802.v1), 2023-08-28
Supplement: Supplementary file 13 [file supplementary]

**Table S5. Thresholds applied in EpiClass analysis of WGBS data from plasma**

| Sample cohort                         | Marker | Methylation density <sup>a</sup> |
|---------------------------------------|--------|----------------------------------|
| Lung cancer <sup>a</sup>              | GALR1  | 35%                              |
|                                       | TLX1   | 10%                              |
|                                       | ZNF154 | 10%                              |
| Hepatocellular carcinoma <sup>b</sup> | GALR1  | 15%                              |
|                                       | TLX1   | 0%                               |
|                                       | ZNF154 | 35%                              |

<sup>a</sup> The methylation density threshold was determined based on a +/- 600bp interval on each side of the CpG of interest

<sup>b</sup> The methylation density threshold was determined based on a +/- 500bp interval on each side of the CpG of interest
