# Supplementary material for: Evaluating Stacked Methylation Markers for Blood-Based Multicancer Detection
Source: Preprints.org preprint supplement (doi:10.20944/preprints202308.1802.v1), 2023-08-28
Supplement: Supplementary file 19 [file supplementary]

Archive with 22 entries (22 files):
- Table S9.pdf
- __MACOSX/._Table S9.pdf
- Supplementary Figures_updated20230731.pptx
- __MACOSX/._Supplementary Figures_updated20230731.pptx
- Table S8.pdf
- __MACOSX/._Table S8.pdf
- Table S7.pdf
- __MACOSX/._Table S7.pdf
- Table S10.pdf
- __MACOSX/._Table S10.pdf
- Table S3.pdf
- __MACOSX/._Table S3.pdf
- Table S1.pdf
- __MACOSX/._Table S1.pdf
- Table S4.xlsx
- __MACOSX/._Table S4.xlsx
- Table S2.pdf
- __MACOSX/._Table S2.pdf
- Table S6.pdf
- __MACOSX/._Table S6.pdf
- Table S5.pdf
- __MACOSX/._Table S5.pdf
